# Supplementary material for: 1931-1936, De la República democrática a la sublevación militar: [actas del] IV Congreso sobre Republicanismo
Source: Royal Society of Chemistry journal article supplement (doi:10.1039/c6dt00920d), 2009-01-01
Supplement: c6dt00920d1.pdf [file c6dt00920d1.pdf]

# Supporting information for

## Thermal and Near-Infrared Light Induced Spin Crossover in a Mononuclear Iron(II) Complex with a Tetrathiafulvalene-Fused Dipyridophenazine Ligand

Fabrice Pointillart,<sup>a\*</sup> Xunshan Liu,<sup>b</sup> Mikaël Kepenekian,<sup>a</sup> Boris Le Guennic,<sup>a</sup> Stéphane Golhen,<sup>a</sup> Vincent Dorcet,<sup>a</sup> Thierry Roisnel,<sup>a</sup> Olivier Cador,<sup>a</sup> Zhonglu You,<sup>bc</sup> Jürg Hauser,<sup>b</sup> Silvio Decurtins,<sup>b</sup> Lahcène Ouahab<sup>a</sup>, Shi-Xia Liu<sup>b\*</sup>

<sup>a</sup> *Institut des Sciences Chimiques de Rennes, UMR 6226 CNRS - Université de Rennes 1, 263 Avenue du Général Leclerc 35042 Rennes Cedex.*

<sup>b</sup> *Departement für Chemie und Biochemie, Universität Bern, Freiestrasse 3, CH-3012 Bern, Switzerland.*

<sup>c</sup> *Present address: Department of Chemistry and Chemical Engineering, Liaoning Normal University, Dalian 116029, P.R. China.*

### Experimental Section

**Crystallography.** Single crystal of  $1 \cdot (\text{CH}_2\text{Cl}_2)_{1.5} \cdot (\text{H}_2\text{O})$  was mounted on a APEXII Bruker-AXS diffractometer (MoK $\alpha$  radiation source,  $\lambda = 0.71073 \text{ \AA}$ ,  $T = 150(2) \text{ K}$ ) for data collection from the Centre de Diffractométrie (CDIFX), Université de Rennes 1, France. Structures were solved with a direct method using the SIR-97 program and refined with a full matrix least-squares method on  $F^2$  using the SHELXL-2014 program.<sup>1</sup> Complete crystal structure results as a CIF file including bond lengths, angles, and atomic coordinates are deposited as Supporting Information.

**Physical Measurements.** Elemental analysis (C, H, N) of the compounds  $1 \cdot (\text{CH}_2\text{Cl}_2)_2$  and **1** were performed at the Centre Régional de Mesures Physiques de l'Ouest, Rennes. Optical absorption spectra were recorded on a Varian Cary 5000 UV-Visible-NIR spectrometer

equipped with an integration sphere. The dc magnetic susceptibility measurements were performed on grinded selected single crystals (for **1**·(CH<sub>2</sub>Cl<sub>2</sub>)<sub>2</sub>) and powder (for **1**) in Teflon tape with a Quantum Design MPMS-XL SQUID magnetometer between 2 and 300 K in applied magnetic field of 0.02 T in the temperature range 2-20 K, 0.2 T in the temperature range 20-80 K and 1 T above 80 K. These measurements were all corrected for the diamagnetic contribution of the Teflon tape and the intrinsic diamagnetism calculated with Pascal's constants.

**Computational Details.** DFT geometry optimization and TD-DFT excitation energy calculations were carried out on the molecular structure of **1** (low-spin state ( $S = 0$ ) for Fe<sup>II</sup>) with the Gaussian 09 (revision A.02) package<sup>2</sup> employing the PBE0 hybrid functional,<sup>3</sup> and applying both a tight self-consistent field convergence criterion ( $10^{-9} - 10^{-10}$  a.u.) and an improved optimization threshold ( $10^{-5}$  a.u. on average forces). The “Stuttgart/Dresden” basis sets and effective core potentials were used to describe the iron atom,<sup>4</sup> whereas all others atoms were described with the SVP basis sets.<sup>5</sup> The first 80 monoelectronic excitations were calculated for **1**. In all steps, a modelling of bulk solvent effects (solvent = dichloromethane) was included through the Polarizable Continuum Model (PCM),<sup>6</sup> using a linear-response non-equilibrium approach for the TD-DFT step.<sup>7</sup> Molecular orbitals were sketched using the Gabedit graphical interface.<sup>8</sup>

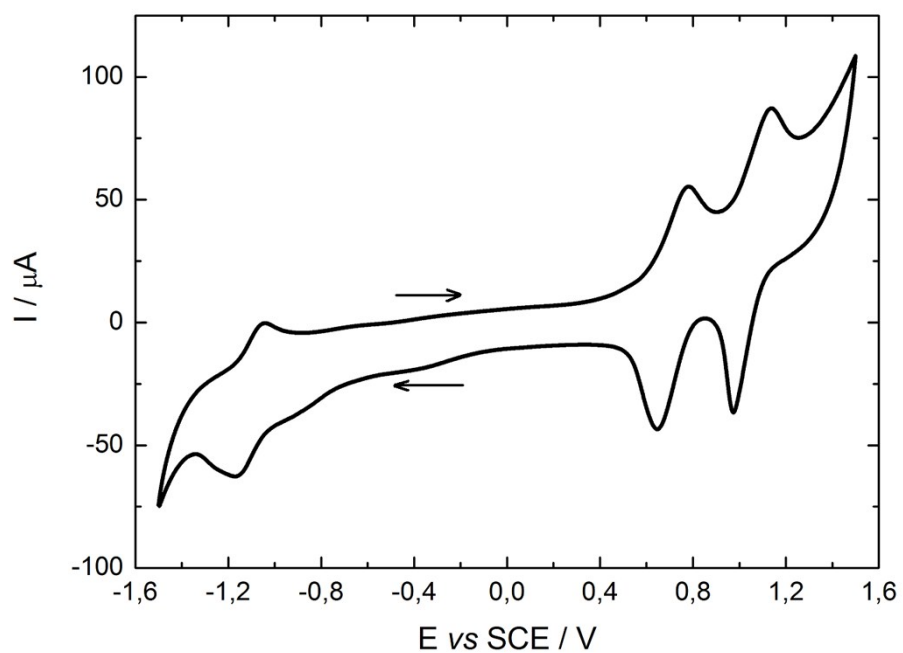

**Fig. S1.** Cyclic voltammetry of **1** in  $\text{CH}_2\text{Cl}_2$  at a scan rate of  $100 \text{ mV} \cdot \text{s}^{-1}$  with  $[\text{N}(\text{C}_4\text{H}_9)_4]\text{PF}_6$  as supporting electrolyte (0.1 M). The potentials were measured vs a saturated calomel electrode (SCE); glassy carbon working electrode; Pt wire counter electrode.

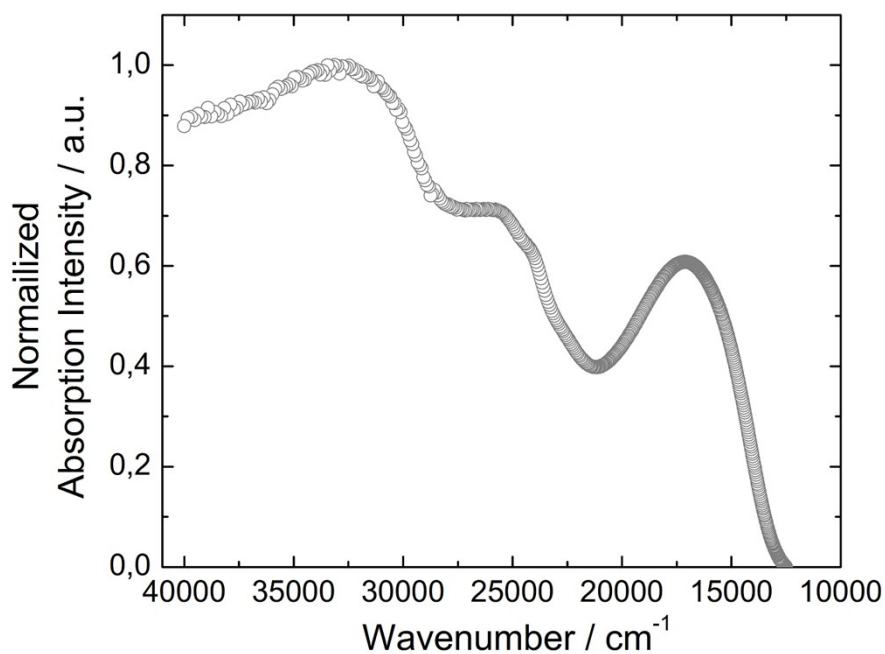

**Fig. S2.** Experimental solid-state UV-visible absorption spectrum for **1** at room temperature.

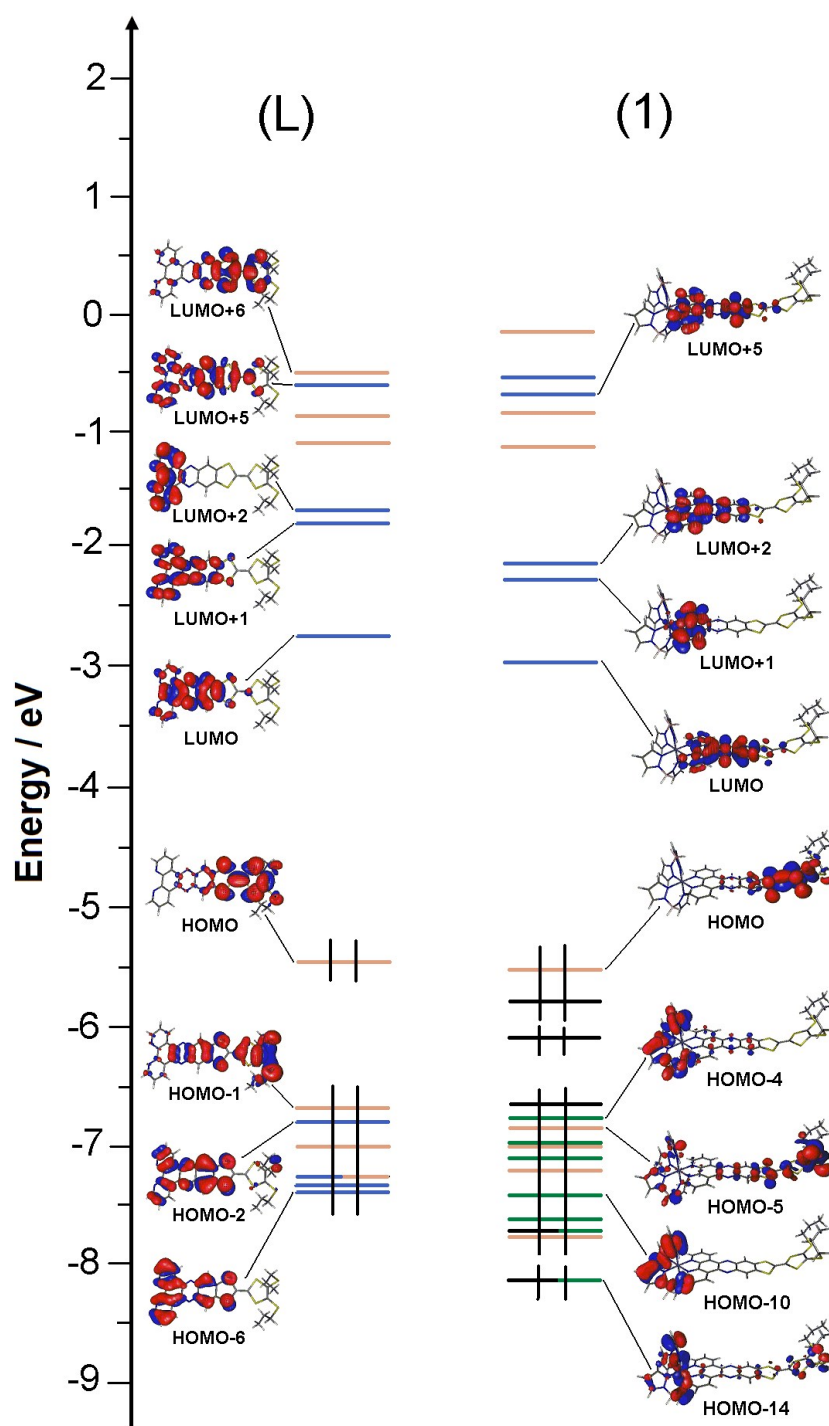

**Fig. S3.** MO diagram of **L** (left) and **1** (right) with the Fe<sup>II</sup> ion in its low-spin ( $S = 0$ ) state. Energy levels of the centered TTF donor, dipyridophenazine acceptor and H<sub>2</sub>Bpz<sub>2</sub> anions are shown in orange, blue and green, respectively.

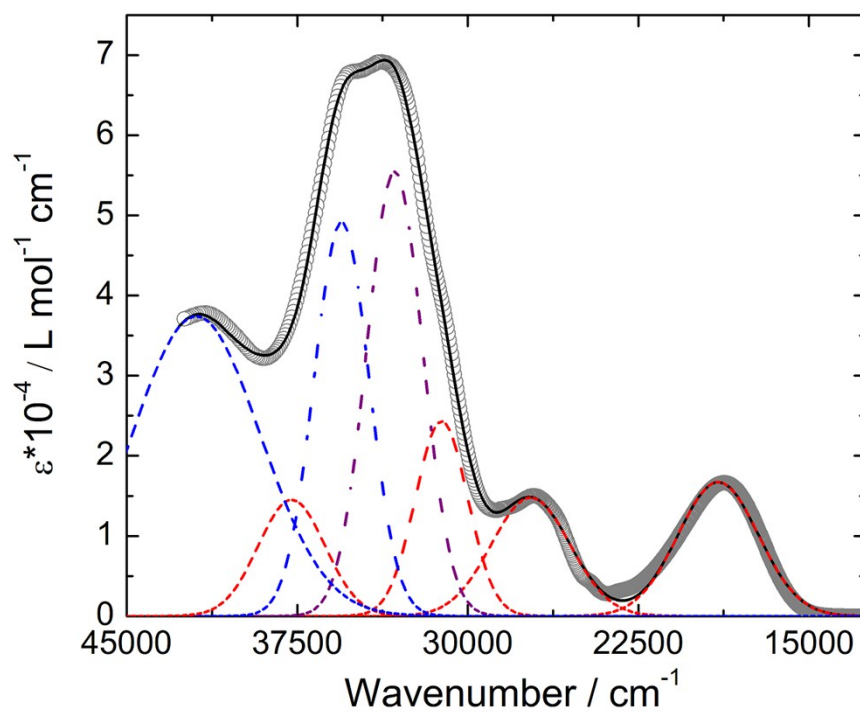

**Fig. S4.** Experimental UV-visible absorption spectra in  $\text{CH}_2\text{Cl}_2$  solution of **L** ( $c = 4 \times 10^{-5} \text{ mol L}^{-1}$ ) (open gray circles). Respective Gaussian decompositions (dashed lines) and best fit (full black line) ( $R^2 = 0.9981$ ).

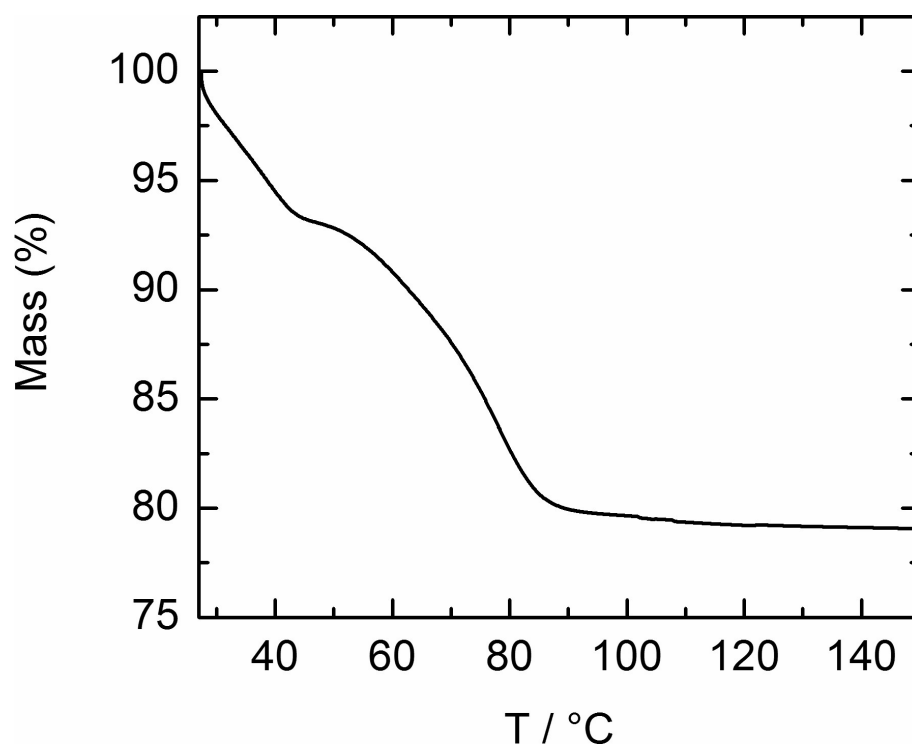

**Fig. S5.** TGA curve of a fresh sample of  $1 \cdot (\text{CH}_2\text{Cl}_2)_2$ .

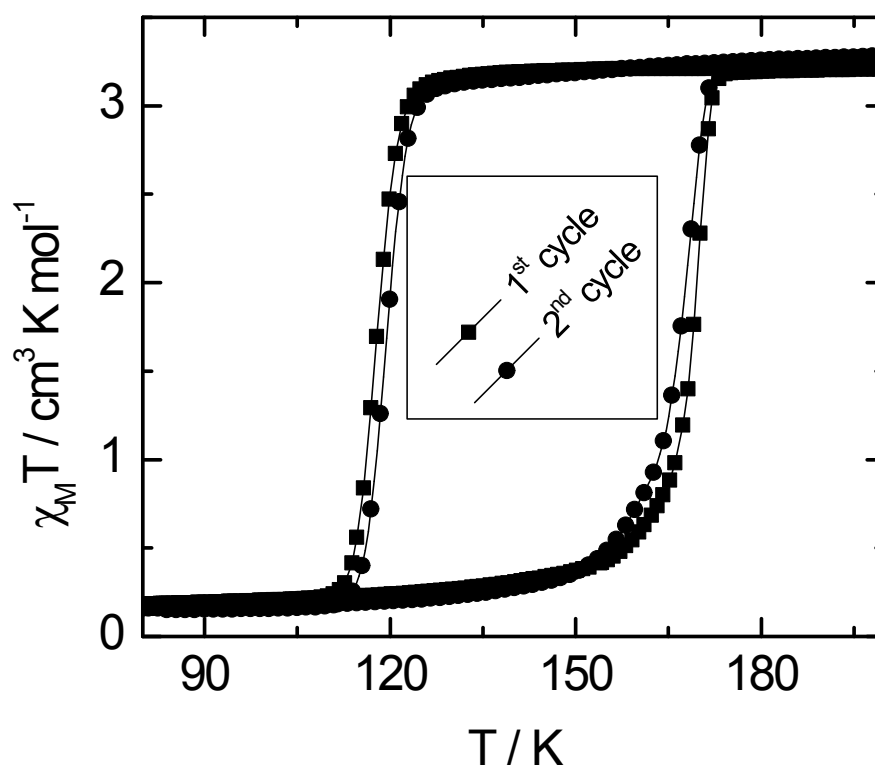

**Fig. S6.** Two hysteresis loops measured on the same sample of **1**.

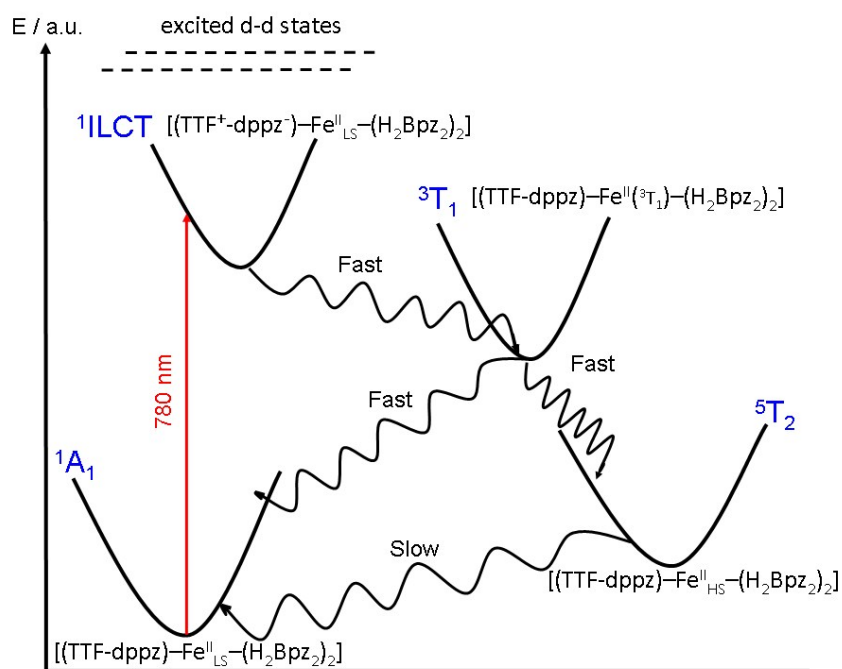

**Fig S7.** Proposed mechanism for the LIESST effect in **1**.

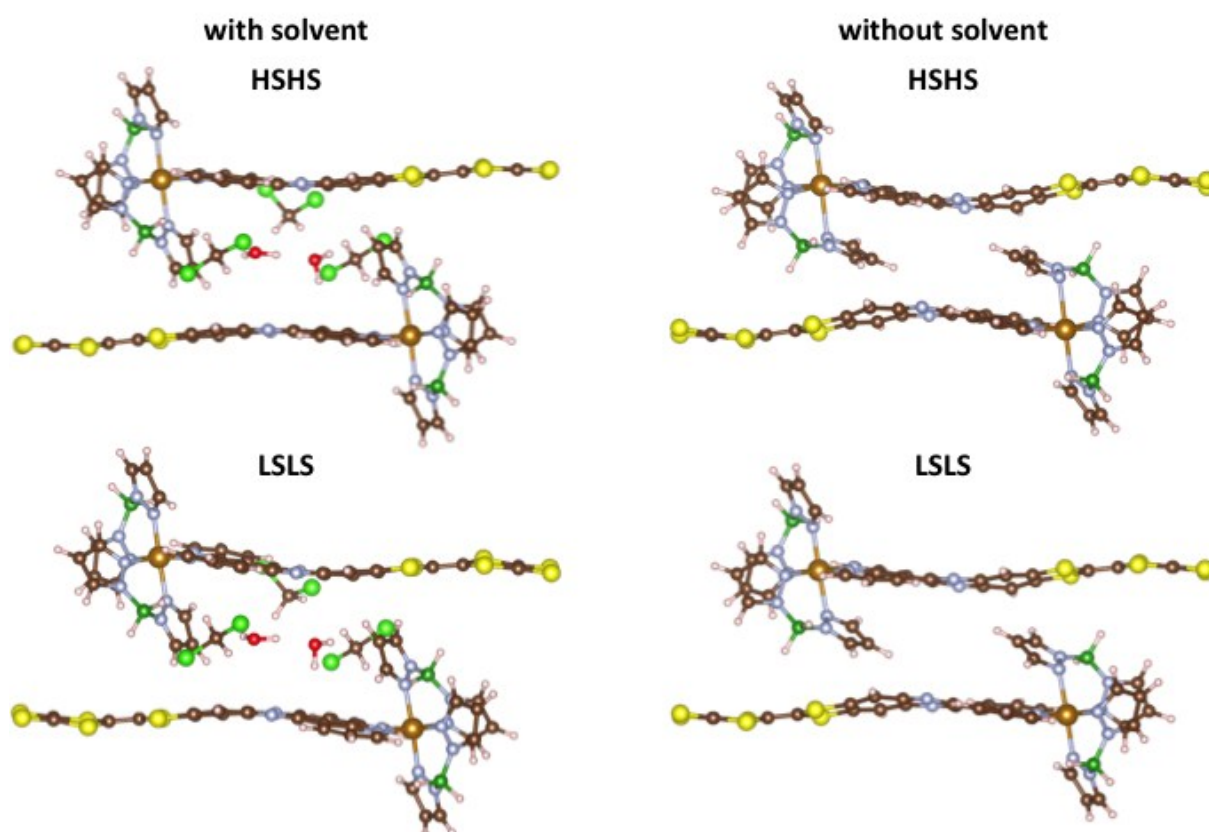

**Fig. S8.** PBE+D3+U optimized geometries for the HS ( $S = 2$ ) and LS ( $S = 0$ ) states of **1** with and without solvent molecules.

**Table S1.** Selected bond lengths (Å) for compound **1**·(CH<sub>2</sub>Cl<sub>2</sub>)<sub>2</sub> at 150 K.

| Compound | 150 K    |
|----------|----------|
| Fe1-N1   | 2.126(3) |
| Fe1-N2   | 2.107(3) |
| Fe1-N3   | 2.108(3) |
| Fe1-N4   | 2.097(3) |
| Fe1-N5   | 2.091(3) |
| Fe1-N6   | 2.098(3) |

**Table S2.** Experimental and TD-DFT excitation energies and main composition of the low-lying electronic transitions for **L** and **1** (calc for LS). In addition, the charge transfer and the pure intramolecular transitions are reported. IA, IL and H, L represent intramolecular dipyrrophenazine (acceptor) transitions or transitions involving orbitals delocalized on the whole ligand and the HOMO and LUMO, respectively. ILCT stands for Intra-Ligand (L) Charge Transfer and LLCT for Ligand (H<sub>2</sub>BPPz<sub>2</sub>) to Ligand (L) Charge Transfer.

|             | E exp (cm <sup>-1</sup> ) | E theo (cm <sup>-1</sup> ) | Osc. | Type | Assignment                                            | Transition           |
|-------------|---------------------------|----------------------------|------|------|-------------------------------------------------------|----------------------|
| <b>(L)*</b> | 19000                     | 17844                      | 0.42 | ILCT | $\pi_{\text{TTF}} \rightarrow \pi^*_{\text{dppz}}$    | H→L (99%)            |
|             | 27200                     | 27338                      | 0.31 | ILCT | $\pi_{\text{TTF}} \rightarrow \pi^*_{\text{dppz}}$    | H-1→L (80%)          |
|             | 31200                     | 33361                      | 0.11 | ILCT | $\pi_{\text{TTF}} \rightarrow \pi^*_{\text{dppz}}$    | H→L+5/+6 (56/33%)    |
|             |                           |                            |      |      | $\pi_{\text{TTF}} \rightarrow \pi^*_{\text{TTF}}$     | H→L+6 (27%)          |
|             | 33200                     | 34504                      | 1.61 | IL   | $\pi_{\text{TTF}} \rightarrow \pi^*_{\text{dppz}}$    | H→L+5 (31%)          |
|             |                           |                            |      |      | $\pi_{\text{dppz}} \rightarrow \pi^*_{\text{dppz}}$   | H-2→L+1 (30%)        |
|             | 35600                     | 35252                      | 0.37 | IA   | $\pi_{\text{dppz}} \rightarrow \pi^*_{\text{dppz}}$   | H-2→L+1 (29%)        |
|             | 37800                     | 36195                      | 0.19 | ILCT | $\pi_{\text{TTF}} \rightarrow \pi^*_{\text{dppz}}$    | H-1→L+1/+2 (45/50%)  |
|             |                           | 36315                      | 0.13 |      |                                                       |                      |
|             | 41900                     | 42128                      | 0.46 | IA   | $\pi_{\text{dppz}} \rightarrow \pi^*_{\text{dppz}}$   | H-6→L+2 (68%)        |
|             | E exp (cm <sup>-1</sup> ) | E theo (cm <sup>-1</sup> ) | Osc. | Type | Assignment                                            | Transition           |
| <b>(1)</b>  | 18000                     | 16924                      | 0.52 | ILCT | $\pi_{\text{TTF}} \rightarrow \pi^*_{\text{dppz}}$    | H→L (98%)            |
|             | 26800                     | 27116                      | 0.27 | ILCT | $\pi_{\text{TTF}} \rightarrow \pi^*_{\text{dppz}}$    | H-5→L (78%)          |
|             | 31100                     | 31585                      | 0.13 | LLCT | $\pi_{\text{H2Bpz2}} \rightarrow \pi^*_{\text{dppz}}$ | H-5/-6→L+1 (19/31%)  |
|             |                           |                            |      |      |                                                       | H-4→L+2(56%)         |
|             |                           |                            |      |      | $\pi_{\text{TTF}} \rightarrow \pi^*_{\text{TTF}}$     | H-13→L (23%)         |
|             | 32800                     | 32612                      | 0.54 | ILCT | $\pi_{\text{TTF}} \rightarrow \pi^*_{\text{dppz}}$    | H→L+5 (59%)          |
|             | 34900                     | 33732                      | 0.61 | LLCT | $\pi_{\text{H2Bpz2}} \rightarrow \pi^*_{\text{hfac}}$ | H-14→L (26%)         |
|             |                           |                            |      | +    |                                                       | H-10/-6→L+1 (78/20%) |
|             |                           |                            |      | ILCT | $\pi_{\text{TTF}} \rightarrow \pi^*_{\text{dppz}}$    | H-5→L+1 (42%)        |
|             |                           |                            |      |      |                                                       | H→L+5/+7 (17/14%)    |
|             | 38200                     | /                          | /    | /    | /                                                     | /                    |
|             | 43200                     | /                          | /    | /    | /                                                     | /                    |

\* The DFT and TD-DFT calculations of the free ligand **L** were already published<sup>9,10</sup> but they were performed again in order to be fully consistent with the applied method for **1**.



**Table S3.** Optimized cell parameters within the PBE+D3+U scheme, with and without solvent, in the LS ( $S = 0$ ) and HS ( $S = 2$ ) states of **1**. In the case of the HS molecule with solvent, our calculated results compare very well with the experimental structure.

|          | no solvent |          | solvent  |          |          |        |
|----------|------------|----------|----------|----------|----------|--------|
|          | LS         | HS       | LS       | HS       | Exp.     | error  |
| a (Å)    | 12.66058   | 12.84277 | 12.75178 | 12.64236 | 12.86030 | -1.69% |
| b (Å)    | 13.37160   | 13.26478 | 13.98492 | 13.92497 | 14.26060 | -2.35% |
| c (Å)    | 14.23453   | 14.29514 | 14.85214 | 15.12474 | 15.79120 | -4.22% |
| $\alpha$ | 76.2502    | 76.3395  | 76.7781  | 78.1181  | 79.1390  | -1.29% |
| $\beta$  | 60.2133    | 60.3670  | 59.5691  | 62.7387  | 66.2380  | -5.28% |
| $\gamma$ | 64.2719    | 64.3674  | 67.4355  | 68.1179  | 71.8570  | -5.20% |

**Table S4.** Optimized Fe-N bond lengths (Å) within the PBE+D3+U scheme, with and without solvent, in the LS ( $S = 0$ ) and HS ( $S = 2$ ) states of **1**. Numbering is attributed following Figure 1. Again, a close agreement is obtained between calculated and experimental structures in the case of the HS structure with solvent. As an important feature, one can notice the particularly long Fe-N bond (2.42 Å) in the HS state of the compound deprived of solvent.

|                   | no solvent |      | solvent |      |      |        |
|-------------------|------------|------|---------|------|------|--------|
|                   | LS         | HS   | LS      | HS   | Exp. | error  |
| Fe-N <sub>1</sub> | 1.97       | 2.17 | 1.94    | 2.15 | 2.11 | +1.90% |
| Fe-N <sub>2</sub> | 1.95       | 2.14 | 1.96    | 2.17 | 2.12 | +2.36% |
| Fe-N <sub>3</sub> | 1.98       | 2.16 | 1.97    | 2.10 | 2.09 | +0.48% |
| Fe-N <sub>4</sub> | 1.98       | 2.09 | 1.99    | 2.13 | 2.08 | +2.40% |
| Fe-N <sub>5</sub> | 2.00       | 2.17 | 1.99    | 2.12 | 2.10 | +0.95% |
| Fe-N <sub>6</sub> | 2.10       | 2.42 | 2.00    | 2.15 | 2.11 | +1.90% |

## References

1. SHELX97 - Programs for Crystal Structure Analysis (Release 97-2). Sheldrick, G. M. Institut für Anorganische Chemie der Universität, Tammanstrasse 4, D-3400 Göttingen, Germany, 1998. SIR97 – A. Altomare, M. C. Burla, M. Camalli, G. L. Cascarano, C. Giacovazzo, A. Guagliardi, A. G. G. Moliterni, G. Polidori, R. Spagna, *J. Appl. Cryst.* 1999, **32**, 115; (b) G. M. Sheldrick, *Acta Crystallogr.* **2008**, **A64**, 112–122; (c) L. J. Farrugia, *J. Appl. Crystallogr.* 2012, **45**, 849–854.
2. M. J. Frisch, G. W. Trucks, H. B. Schlegel, G. E. Scuseria, M. A. Robb, J. R. Cheeseman, G. Scalmani, V. Barone, B. Mennucci, G. A. Petersson, H. Nakatsuji, M. Caricato, X. Li, H. P. Hratchian, A. F. Izmaylov, J. Bloino, G. Zheng, J. L. Sonnenberg, M. Hada, M. Ehara, K. Toyota, R. Fukuda, J. Hasegawa, M. Ishida, T. Nakajima, Y. Honda, O. Kitao, H. Nakai, T. Vreven, J. A. Montgomery, Jr. J. E. Peralta, F. Ogliaro, M. Bearpark, J. J. Heyd, E. Brothers, K. N. Kudin, V. N. Staroverov, R. Kobayashi, J. Normand, K. Raghavachari, A. Rendell, J. C. Burant, S. S. Iyengar, J. Tomasi, M. Cossi, N. Rega, J. M. Millam, M. Klene, J. E. Knox, J. B. Cross, V. Bakken, C. Adamo, J. Jaramillo, R. Gomperts, R. E. Stratmann, O. Yazyev, A. J. Austin, R. Cammi, C. Pomelli, J. W. Ochterski, R. L. Martin, K. Morokuma, V. G. Zakrzewski, G. A. Voth, P. Salvador, J. J. Dannenberg, S. Dapprich, A. D. Daniels, O. Farkas, J. B. Foresman, J. V. Ortiz, J. Cioslowski and D. J. Fox, Gaussian 09 Revision A.02, Gaussian Inc., Wallingford CT, **2009**.
3. (a) J. P. Perdew, K. Burke and M. Ernzerhof, *Phys. Rev. Lett.*, 1996, **77**, 3865; (b) C. Adamo and V. Barone, *J. Chem. Phys.*, 1999, **110**, 6158.
4. M. Dolg, H. Stoll and H. Preuss, *Theor. Chim. Acta*, 1993, **85**, 441.
5. F. Weigend and R. Ahlrichs, *Phys. Chem. Chem. Phys.*, 2005, **7**, 3297-3305.
6. J. Tomasi, B. Mennucci and R. Cammi, *Chem. Rev.*, 2005, **105**, 2999-3094.
7. (a) M. Cossi and V. Barone, *J. Chem. Phys.*, 2001, **115**, 4708; (b) R. Improta, V. Barone, G. Scalmani and M. J. Frisch, *J. Chem. Phys.*, 2006, **125**, 054103.
8. A.-R. Allouche, *J. Comput. Chem.*, **2011**, **32**, 174-182.
9. C. Jia, S.-X. Liu, C. Tanner, C. Leiggener, A. Neels, L. Sanguinet, E. Levillain, S. Leutwyler, A. Hauser and S. Decurtins, *Chem. Eur. J.*, 2007, **13**, 3804-3812.
10. F. Pointillart, J. Jung, R. Berraud-Pache, B. Le Guennic, V. Dorcet, S. Golhen, O. Cador, O. Maury, Y. Guyot, S. Decurtins, S.-X. Liu and L. Ouahab, *Inorg. Chem.*, 2015, **54**, 5384-5397.
